# Supplementary material
Source: PubMed Central journal article supplement (PMC6039661)
Supplement: ba017772-suppl1.pdf [file ba017772-suppl1.pdf]

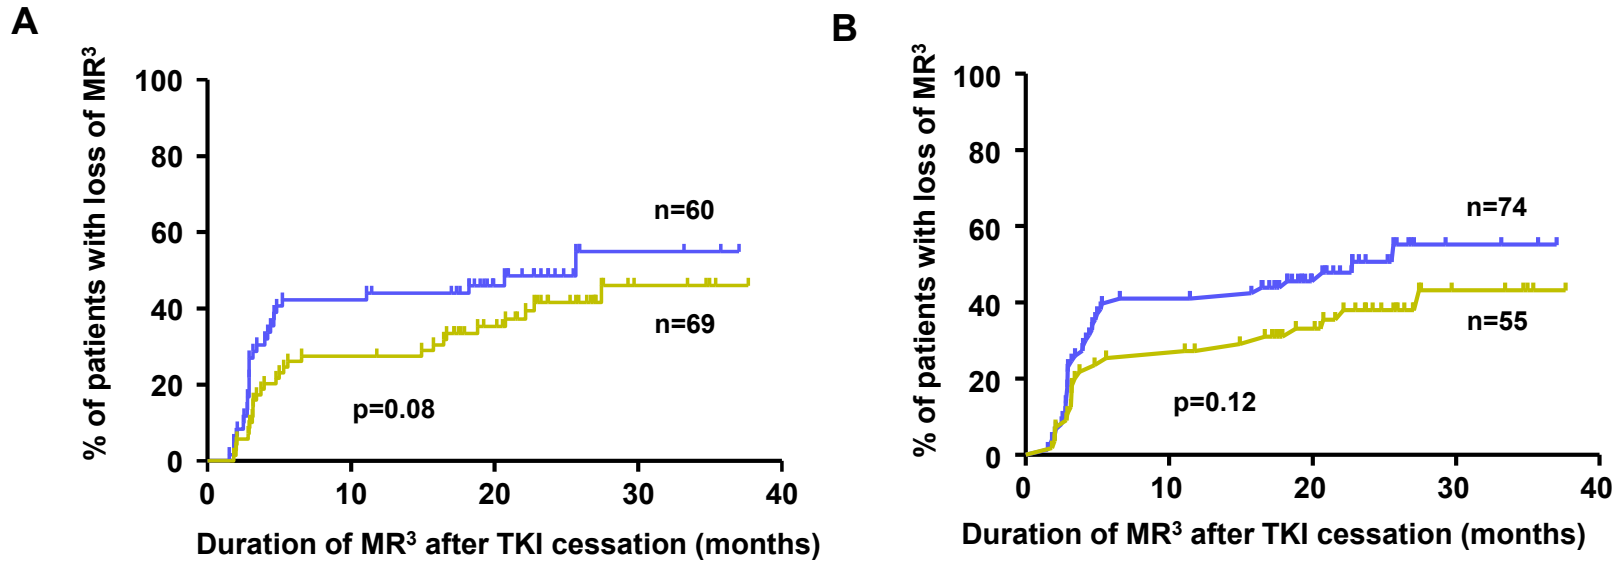

Suppl. Figure 1. Kaplan-Myer analysis for the proportion of EURO-SKI study patients with loss of major molecular response (MMR, MR3) on the basis of shortened (blue curve) vs normal/elongated (yellow curve) age-adjusted telomere length in the peripheral blood granulocytes (A;  $p=0.080$ ) and lymphocytes (B;  $p=0.120$ ).

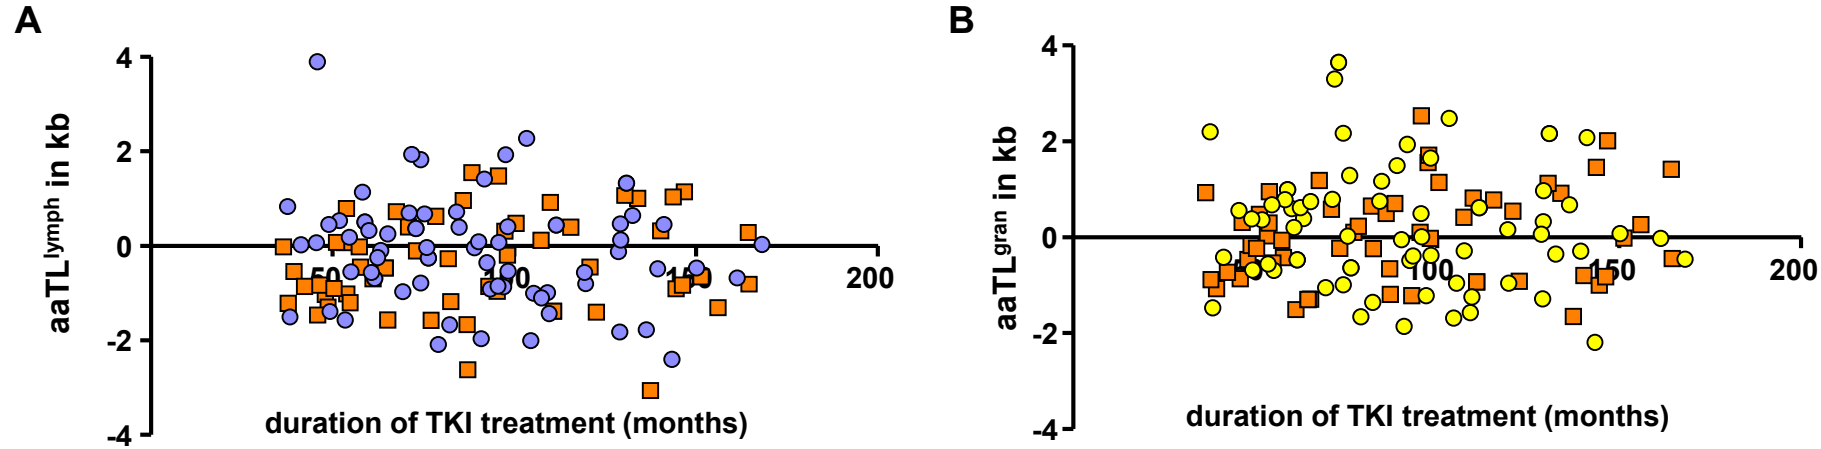

**Suppl. Figure 2. Age-adapted telomere length (aaTL) in peripheral blood of CML patients in deep molecular remission. (A)** Correlation between treatment duration (in months) and aaTL<sub>lymph</sub> (in Kb) in patients with loss of MR3 (orange squares) or sustained MR3 (blue circles) after TKI cessation, **(B)** correlation between treatment duration (in months) and aaTL<sub>gran</sub> (in Kb) of patients loss of MR3 (orange squares) or sustained MR3 (yellow circles) after TKI cessation.

|                                         | Data available n (%) | Median | Minimum | Maximum |
|-----------------------------------------|----------------------|--------|---------|---------|
| Age (years)                             | 134 (100%)           | 61.6   | 21.1    | 83.2    |
| Sokal score                             | 75 (56%)             | 0.90   | 0.40    | 2.50    |
| Euro score                              | 68 (51%)             | 954.4  | 58.40   | 2250    |
| Eutos score                             | 81 (60%)             | 28.0   | 0       | 127.5   |
| Timo to MMR (months)                    | 121 (90%)            | 20.1   | 1.4     | 132.8   |
| Duration of TKI treatment (months)      | 128 (96%)            | 86.5   | 36.4    | 168.1   |
| Duration of MMR after TKI stop (months) | 129 (96%)            | 12.2   | 1.5     | 37.7    |

**Suppl. Table 1. Stratification of the 134 patients enrolled in the EURO-SKI study according to demographics, clinical risk score and treatment parameters.** MMR: major molecular response (MR3). TKI: tyrosine kinase inhibitor
